# Supplementary material
Source: ML conference proceedings conference paper supplement (https://proceedings.neurips.cc/paper_files/paper/2019/hash/ea4eb49329550caaa1d2044105223721-Abstract.html)
Supplement: Supplementary file [file ea4eb49329550caaa1d2044105223721-Supplemental.zip]

# Supplementary Materials for “Double Quantization for Communication-Efficient Distributed Optimization”

## 1 Convergence Analysis for AsyLPG

**Lemma 1.** For a vector  $v \in \mathbb{R}^d$ , if  $\delta = \frac{\|v\|_\infty}{2^{b-1}-1}$  or  $\frac{\|v\|_2}{2^{b-1}-1}$ , we have

$$\mathbf{E}\|Q_{(\delta,b)}(v) - v\|^2 \leq \frac{d\delta^2}{4}. \quad (1)$$

*Proof.* Because the squared  $L_2$  norm separates along dimensions and each coordinate of  $v$  is independently quantized, we only need to prove  $\mathbf{E}\|Q_{(\delta,b)}([v]_i) - [v]_i\|^2 \leq \frac{\delta^2}{4}$ , for all  $i \in \{1, \dots, d\}$ . If the scaling factor  $\delta = \frac{\|v\|_\infty}{2^{b-1}-1}$  or  $\frac{\|v\|_2}{2^{b-1}-1}$ , it can be verified that  $[v]_i$  locates in the convex hull of  $\text{dom}(\delta, b)$  and  $Q_{(\delta,b)}(v)$  is an unbiased quantization. Then  $\mathbf{E}\|Q_{(\delta,b)}([v]_i) - [v]_i\|^2 \leq \frac{\delta^2}{4}$  according to Lemma 1 in [4].  $\square$

**Lemma 2.** If Assumptions 1, 2, 3 hold, then for the gradient  $u_t^{s+1}$  in Algorithm 1, its variance can be bounded by

$$\mathbf{E}\|u_t^{s+1} - \nabla f(x_t^{s+1})\|^2 \leq 2L^2(\mu + 1)(\Delta + 2)\mathbf{E}\left[\|x_{D(t)}^{s+1} - x_t^{s+1}\|^2 + \|x_t^{s+1} - \tilde{x}^s\|^2\right], \quad (2)$$

where  $\Delta = \frac{d}{4(2^{b-1}-1)^2}$ .

*Proof.*

$$\begin{aligned} & \mathbf{E}\|u_t^{s+1} - \nabla f(x_t^{s+1})\|^2 \\ &= \mathbf{E}\|Q_{(\delta_{\alpha_t}, b)}(\alpha_t) + \nabla f(\tilde{x}^s) - \nabla f(x_t^{s+1})\|^2 \\ &= \mathbf{E}\|Q_{(\delta_{\alpha_t}, b)}(\alpha_t) - \alpha_t + \alpha_t + \nabla f(\tilde{x}^s) - \nabla f(x_t^{s+1})\|^2 \\ &= \mathbf{E}\|Q_{(\delta_{\alpha_t}, b)}(\alpha_t) - \alpha_t\|^2 + \mathbf{E}\|\alpha_t + \nabla f(\tilde{x}^s) - \nabla f(x_t^{s+1})\|^2 \\ &\leq \underbrace{\Delta \mathbf{E}\|\alpha_t\|^2}_{T_1} + \underbrace{\mathbf{E}\|\alpha_t + \nabla f(\tilde{x}^s) - \nabla f(x_t^{s+1})\|^2}_{T_2}, \end{aligned} \quad (3)$$

where the third equality holds because  $\delta_{\alpha_t} = \frac{\|\alpha_t\|_\infty}{2^{b-1}-1}$  and  $Q_{(\delta_{\alpha_t}, b)}(\alpha_t)$  is an unbiased quantization. The final inequality follows from Lemma 1. Next we bound  $T_1$  and  $T_2$ .

$$\begin{aligned} T_1 &= \mathbf{E}\|\nabla f_a(Q_{(\delta_x, b_x)}(x_{D(t)}^{s+1})) - \nabla f_a(\tilde{x}^s)\|^2 \\ &\leq L^2 \mathbf{E}\|Q_{(\delta_x, b_x)}(x_{D(t)}^{s+1}) - \tilde{x}^s\|^2 \\ &= L^2 \mathbf{E}\|Q_{(\delta_x, b_x)}(x_{D(t)}^{s+1}) - x_{D(t)}^{s+1}\|^2 + L^2 \mathbf{E}\|x_{D(t)}^{s+1} - \tilde{x}^s\|^2 \\ &\leq L^2(\mu + 1) \mathbf{E}\|x_{D(t)}^{s+1} - \tilde{x}^s\|^2 \\ &\leq 2L^2(\mu + 1) \mathbf{E}\|x_{D(t)}^{s+1} - x_t^{s+1}\|^2 + 2L^2(\mu + 1) \mathbf{E}\|x_t^{s+1} - \tilde{x}^s\|^2, \end{aligned} \quad (4)$$

where the first inequality adopts the Lipschitz smooth property of  $f_a(x)$ , and the second equality holds because  $\delta_x = \frac{\|x_{D(t)}^{s+1}\|_\infty}{2^{b_x-1}-1}$  and  $Q_{(\delta_x, b_x)}(x_{D(t)}^{s+1})$  is an unbiased quantization. The second inequality uses the condition in Step 7 of

Algorithm 1. With similar arguments, we obtain the upper bound of  $T_2$  in the following.

$$\begin{aligned}
T_2 &= \mathbf{E} \|\nabla f_a(Q_{(\delta_x, b_x)}(x_{D(t)}^{s+1})) - \nabla f_a(\tilde{x}^s) + \nabla f(\tilde{x}^s) - \nabla f(x_t^{s+1})\|^2 \\
&\leq 2\mathbf{E} \|\nabla f_a(Q_{(\delta_x, b_x)}(x_{D(t)}^{s+1})) - \nabla f_a(x_{D(t)}^{s+1})\|^2 + 2\mathbf{E} \|\nabla f_a(x_{D(t)}^{s+1}) - \nabla f_a(\tilde{x}^s) + \nabla f(\tilde{x}^s) - \nabla f(x_t^{s+1})\|^2 \\
&\leq 2\mathbf{E} \|\nabla f_a(Q_{(\delta_x, b_x)}(x_{D(t)}^{s+1})) - \nabla f_a(x_{D(t)}^{s+1})\|^2 + 4\mathbf{E} \|\nabla f_a(x_{D(t)}^{s+1}) - \nabla f_a(x_t^{s+1})\|^2 \\
&\quad + 4\mathbf{E} \|\nabla f_a(x_t^{s+1}) - \nabla f_a(\tilde{x}^s) + \nabla f(\tilde{x}^s) - \nabla f(x_t^{s+1})\|^2 \\
&\leq 2\mathbf{E} \|\nabla f_a(Q_{(\delta_x, b_x)}(x_{D(t)}^{s+1})) - \nabla f_a(x_{D(t)}^{s+1})\|^2 + 4\mathbf{E} \|\nabla f_a(x_{D(t)}^{s+1}) - \nabla f_a(x_t^{s+1})\|^2 + 4\mathbf{E} \|\nabla f_a(x_t^{s+1}) - \nabla f_a(\tilde{x}^s)\|^2 \\
&\leq 2L^2\mathbf{E} \|Q_{(\delta_x, b_x)}(x_{D(t)}^{s+1}) - x_{D(t)}^{s+1}\|^2 + 4L^2\mathbf{E} \|x_{D(t)}^{s+1} - x_t^{s+1}\|^2 + 4L^2\mathbf{E} \|x_t^{s+1} - \tilde{x}^s\|^2 \\
&\leq 4L^2(\mu + 1)\mathbf{E} \|x_{D(t)}^{s+1} - x_t^{s+1}\|^2 + 4L^2(\mu + 1)\mathbf{E} \|x_t^{s+1} - \tilde{x}^s\|^2.
\end{aligned} \tag{5}$$

where in the third inequality we adopt  $\mathbf{E} \|\nabla f_a(x_t^{s+1}) - \nabla f_a(\tilde{x}^s) + \nabla f(\tilde{x}^s) - \nabla f(x_t^{s+1})\|^2 \leq \mathbf{E} \|\nabla f_a(x_t^{s+1}) - \nabla f_a(\tilde{x}^s)\|^2$ . It is true because  $\mathbf{E} \|x - \mathbf{E}[x]\|^2 \leq \mathbf{E} \|x\|^2$ . The last inequality follows from Step 7 of Algorithm 1. Putting them together, we obtain Lemma 2.  $\square$

**Proof of Theorem 2.** Define  $\bar{x}_{t+1}^{s+1} \triangleq \text{prox}_{\eta h}(x_t^{s+1} - \eta \nabla f(x_t^{s+1}))$ . According to equations (8)-(12) in [2], we get

$$\begin{aligned}
&\mathbf{E} \left[ P(x_{t+1}^{s+1}) \right] \\
&\leq \mathbf{E} \left[ P(x_t^{s+1}) + (L - \frac{1}{2\eta}) \|\bar{x}_{t+1}^{s+1} - x_t^{s+1}\|^2 + (\frac{L}{2} - \frac{1}{2\eta}) \|x_{t+1}^{s+1} - x_t^{s+1}\|^2 - \frac{1}{2\eta} \|x_{t+1}^{s+1} - \bar{x}_{t+1}^{s+1}\|^2 \right. \\
&\quad \left. + \langle x_{t+1}^{s+1} - \bar{x}_{t+1}^{s+1}, \nabla f(x_t^{s+1}) - u_t^{s+1} \rangle \right] \\
&\leq \mathbf{E} \left[ P(x_t^{s+1}) + \frac{\eta}{2} \|u_t^{s+1} - \nabla f(x_t^{s+1})\|^2 + (L - \frac{1}{2\eta}) \|\bar{x}_{t+1}^{s+1} - x_t^{s+1}\|^2 + (\frac{L}{2} - \frac{1}{2\eta}) \|x_{t+1}^{s+1} - x_t^{s+1}\|^2 \right].
\end{aligned} \tag{6}$$

Using Lemma 2, we have

$$\begin{aligned}
\mathbf{E} \left[ P(x_{t+1}^{s+1}) \right] &\leq \mathbf{E} \left[ P(x_t^{s+1}) + \eta L^2(\mu + 1)(\Delta + 2) \|x_{D(t)}^{s+1} - x_t^{s+1}\|^2 + \eta L^2(\mu + 1)(\Delta + 2) \|x_t^{s+1} - \tilde{x}^s\|^2 \right. \\
&\quad \left. + (L - \frac{1}{2\eta}) \|\bar{x}_{t+1}^{s+1} - x_t^{s+1}\|^2 + (\frac{L}{2} - \frac{1}{2\eta}) \|x_{t+1}^{s+1} - x_t^{s+1}\|^2 \right].
\end{aligned} \tag{7}$$

Define  $R_t^{s+1} \triangleq \mathbf{E} \left[ P(x_t^{s+1}) + c_t \|x_t^{s+1} - \tilde{x}^s\|^2 \right]$ , where  $\{c_t\}_{t=0}^m$  is a nonnegative decreasing sequence with  $c_m = 0$ ,  $c_t = c_{t+1}(1 + \beta) + \eta L^2(\mu + 1)(\Delta + 2)$  and  $\beta = \frac{1}{m}$ . Therefore,

$$\begin{aligned}
c_0 &\leq \eta L^2(\mu + 1)(\Delta + 2) \cdot \frac{(1 + \beta)^m - 1}{\beta} \\
&\leq 2\eta L^2(\mu + 1)(\Delta + 2)m.
\end{aligned} \tag{8}$$

From the definition of  $R_t^{s+1}$ , we obtain

$$\begin{aligned}
R_{t+1}^{s+1} &= \mathbf{E} \left[ P(x_{t+1}^{s+1}) + c_{t+1} \|x_{t+1}^{s+1} - \tilde{x}^s\|^2 \right] \\
&\leq \mathbf{E} \left[ P(x_{t+1}^{s+1}) + c_{t+1}(1 + \frac{1}{\beta}) \|x_{t+1}^{s+1} - x_t^{s+1}\|^2 + c_{t+1}(1 + \beta) \|x_t^{s+1} - \tilde{x}^s\|^2 \right] \\
&\leq \mathbf{E} \left[ P(x_t^{s+1}) + c_t \|x_t^{s+1} - \tilde{x}^s\|^2 + (c_{t+1}(1 + \frac{1}{\beta}) + \frac{L}{2} - \frac{1}{2\eta}) \|x_{t+1}^{s+1} - x_t^{s+1}\|^2 + (L - \frac{1}{2\eta}) \|\bar{x}_{t+1}^{s+1} - x_t^{s+1}\|^2 \right. \\
&\quad \left. + \eta L^2(\mu + 1)(\Delta + 2) \sum_{d=D(t)}^{t-1} \|x_{d+1}^{s+1} - x_d^{s+1}\|^2 \right].
\end{aligned} \tag{9}$$

Summing over  $t = 0$  to  $m - 1$ , we get

$$\begin{aligned} \sum_{t=0}^{m-1} R_{t+1}^{s+1} &\leq \sum_{t=0}^{m-1} R_t^{s+1} + \sum_{t=0}^{m-1} \left[ c_{t+1} \left(1 + \frac{1}{\beta}\right) + \frac{L}{2} - \frac{1}{2\eta} + \eta L^2 (\mu + 1) (\Delta + 2) \tau^2 \right] \mathbf{E} \|x_{t+1}^{s+1} - x_t^{s+1}\|^2 \\ &\quad + \sum_{t=0}^{m-1} \left( L - \frac{1}{2\eta} \right) \mathbf{E} \|\bar{x}_{t+1}^{s+1} - x_t^{s+1}\|^2. \end{aligned} \quad (10)$$

The inequality holds because  $\sum_{t=0}^{m-1} \sum_{d=D(t)}^{t-1} \|x_{d+1}^{s+1} - x_d^{s+1}\|^2 \leq \tau \sum_{t=0}^{m-1} \|x_{t+1}^{s+1} - x_t^{s+1}\|^2$ .

Now we derive the bound for  $\eta$  to make  $\left[ c_{t+1} \left(1 + \frac{1}{\beta}\right) + \frac{L}{2} - \frac{1}{2\eta} + \eta L^2 (\mu + 1) (\Delta + 2) \tau^2 \right] \leq 0$ . Since  $c_t$  is a decreasing sequence, we only need to prove the above inequality for  $c_0$ . Let  $\eta = \frac{\rho}{L}$ , where  $\rho < \frac{1}{2}$  is a positive constant. After calculations, we obtain the following constraint:

$$8\rho^2 m^2 (\mu + 1) (\Delta + 2) + 2\rho^2 (\mu + 1) (\Delta + 2) \tau^2 + \rho \leq 1. \quad (11)$$

If (11) holds, then

$$\sum_{t=0}^{m-1} R_{t+1}^{s+1} \leq \sum_{t=0}^{m-1} R_t^{s+1} + \left( L - \frac{1}{2\eta} \right) \sum_{t=0}^{m-1} \mathbf{E} \|\bar{x}_{t+1}^{s+1} - x_t^{s+1}\|^2. \quad (12)$$

Because  $x_0^{s+1} = \tilde{x}^s$ ,  $x_m^{s+1} = \tilde{x}^{s+1}$  and  $c_m = 0$ , we have  $R(x_0^{s+1}) = P(\tilde{x}^s)$  and  $R(x_m^{s+1}) = P(\tilde{x}^{s+1})$ . Summing (12) over  $s = 0$  to  $S - 1$ , we get

$$\left( \frac{1}{2\eta} - L \right) \sum_{s=0}^{S-1} \sum_{t=0}^{m-1} \mathbf{E} \|\bar{x}_{t+1}^{s+1} - x_t^{s+1}\|^2 \leq P(x^0) - P(x^*). \quad (13)$$

Using the definition of  $G_\eta(x_t^{s+1}) \triangleq \frac{1}{\eta} [x_t^{s+1} - \text{prox}_{\eta h}(x_t^{s+1} - \eta \nabla f(x_t^{s+1}))]$ , we obtain Theorem 2.  $\square$

## 2 Analysis for Sparse-AsyLPG

**Lemma 3.** Define  $\varphi_t \triangleq \sum_{i=1}^d p_i$ . If  $\varphi_t \leq \frac{\|\alpha_t\|_1}{\|\alpha_t\|_\infty}$ , then for  $\alpha_t = \sum_{i=1}^d \alpha_{t,i} e_i$ , we have  $\mathbf{E} \|\beta_t\|^2 \geq \frac{1}{\varphi_t} \|\alpha_t\|_1^2$ . The equality holds if and only if  $p_i = \frac{|\alpha_{t,i}| \cdot \varphi_t}{\|\alpha_t\|_1}$ .

*Proof Sketch.* From the calculation of  $\beta_t$ , we obtain  $\mathbf{E} \|\beta_t\|^2 = \sum_{i=1}^d \frac{\alpha_{t,i}^2}{p_i}$ . If  $\varphi_t \leq \frac{\|\alpha_t\|_1}{\|\alpha_t\|_\infty}$ , then it can be concluded from Lemma 3 and Theorem 5 in [3] that  $\mathbf{E} \|\beta_t\|^2 \geq \frac{1}{\varphi_t} \|\alpha_t\|_1^2$ , with equality if and only if  $p_i = \frac{|\alpha_{t,i}| \cdot \varphi_t}{\|\alpha_t\|_1}$ .  $\square$

**Lemma 4.** Suppose  $\varphi_t \leq \frac{\|\alpha_t\|_1}{\|\alpha_t\|_\infty}$ , Assumptions 1, 2, 3 hold, and for each  $i \in \{1, \dots, d\}$ ,  $p_i = \frac{|\alpha_{t,i}| \cdot \varphi_t}{\|\alpha_t\|_1}$ . Denote  $\Gamma = \frac{d^2}{4\varphi(2^{b-1}-1)^2} + \frac{d}{\varphi} + 1$ , where  $\varphi = \min_t \{\varphi_t\}$ . Then, for the gradient  $u_t^{s+1}$  in Sparse-AsyLPG, we have

$$\mathbf{E} \|u_t^{s+1} - \nabla f(x_t^{s+1})\|^2 \leq 2L^2 (\mu + 1) \Gamma \mathbf{E} \left[ \|x_{D(t)}^{s+1} - x_t^{s+1}\|^2 + \|x_t^{s+1} - \tilde{x}^s\|^2 \right]. \quad (14)$$

*Proof.*

$$\begin{aligned} &\mathbf{E} \|u_t^{s+1} - \nabla f(x_t^{s+1})\|^2 \\ &= \mathbf{E} \|Q_{(\delta_{\beta_t}, b)}(\beta_t) + \nabla f(\tilde{x}^s) - \nabla f(x_t^{s+1})\|^2 \\ &= \mathbf{E} \|Q_{(\delta_{\beta_t}, b)}(\beta_t) - \beta_t\|^2 + \mathbf{E} \|\beta_t + \nabla f(\tilde{x}^s) - \nabla f(x_t^{s+1})\|^2 \\ &\leq \frac{d}{4(2^{b-1}-1)^2} \mathbf{E} \|\beta_t\|^2 + \mathbf{E} \|\beta_t - \alpha_t\|^2 + \mathbf{E} \|\alpha_t + \nabla f(\tilde{x}^s) - \nabla f(x_t^{s+1})\|^2 \\ &= \left[ \frac{d}{4(2^{b-1}-1)^2} + 1 \right] \mathbf{E} \|\beta_t\|^2 - \mathbf{E} \|\alpha_t\|^2 + \mathbf{E} \|\alpha_t + \nabla f(\tilde{x}^s) - \nabla f(x_t^{s+1})\|^2 \end{aligned} \quad (15)$$

where the second equality holds because  $Q_{(\delta_{\beta_t}, b)}(\beta_t)$  is an unbiased quantization. The first inequality uses Lemma 1 and  $\mathbf{E}[\beta_t] = \alpha_t$ . According to  $T_2$  we get

$$\begin{aligned} & \mathbf{E} \|u_t^{s+1} - \nabla f(x_t^{s+1})\|^2 \\ & \leq \left[ \frac{d}{4(2^{b-1}-1)^2} + 1 \right] \mathbf{E} \|\beta_t\|^2 - \mathbf{E} \|\alpha_t\|^2 + 4L^2(\mu+1) \mathbf{E} \|x_{D(t)}^{s+1} - x_t^{s+1}\|^2 + 4L^2(\mu+1) \mathbf{E} \|x_t^{s+1} - \tilde{x}^s\|^2. \end{aligned} \quad (16)$$

From Lemma 3, we obtain

$$\begin{aligned} & \mathbf{E} \|u_t^{s+1} - \nabla f(x_t^{s+1})\|^2 \\ & \leq \left[ \frac{d^2}{4\varphi(2^{b-1}-1)^2} + \frac{d}{\varphi} - 1 \right] \mathbf{E} \|\alpha_t\|^2 + 4L^2(\mu+1) \mathbf{E} \|x_{D(t)}^{s+1} - x_t^{s+1}\|^2 + 4L^2(\mu+1) \mathbf{E} \|x_t^{s+1} - \tilde{x}^s\|^2 \\ & \leq 2L^2(\mu+1) \left[ \frac{d^2}{4\varphi(2^{b-1}-1)^2} + \frac{d}{\varphi} + 1 \right] \mathbf{E} \|x_{D(t)}^{s+1} - x_t^{s+1}\|^2 + 2L^2(\mu+1) \left[ \frac{d^2}{4\varphi(2^{b-1}-1)^2} + \frac{d}{\varphi} + 1 \right] \mathbf{E} \|x_t^{s+1} - \tilde{x}^s\|^2, \end{aligned} \quad (17)$$

where the first inequality uses  $\|x\|_1 \leq \sqrt{d}\|x\|_2$  for  $x \in \mathbb{R}^d$  and  $\mathbf{E} \|\beta_t\|^2 = \frac{1}{\varphi_t} \|\alpha_t\|_1^2$  when  $p_i = \frac{|\alpha_{t,i}| \cdot \varphi_t}{\|\alpha_t\|_1}$ . The final inequality comes from the upper bound of  $T_1$ .  $\square$

**Proof sketch of Theorem 3.** Substituting (14) in (6) and following the proof of Theorem 2, we obtain a convergence rate of

$$\mathbf{E} \|G_\eta(x_{out})\|^2 \leq \frac{2L[P(x^0) - P(x^*)]}{\rho(1-2\rho)T}, \quad (18)$$

if  $8\rho^2 m^2(\mu+1)\Gamma + 2\rho^2(\mu+1)\tau^2\Gamma + \rho \leq 1$ , where  $\Gamma = \frac{d^2}{4\varphi(2^{b-1}-1)^2} + \frac{d}{\varphi} + 1$ .  $\square$

### 3 Proof of Theorem 4

The following lemma is a widely used technical result in composite optimization, which is called *3-Point-Property*. Lemma 1 in [1] provides its detailed proofs and extensions.

**Lemma 5.** *If  $y_{t+1}^s$  is the optimal solution of*

$$\min_{y \in \chi} \phi(y) + \frac{1}{2\eta_s} \|y - y_t^s\|^2, \quad (19)$$

where function  $\phi(y)$  is convex over a convex set  $\chi$ . Then for any  $y \in \chi$ , we have [1]

$$\phi(y) + \frac{1}{2\eta_s} \|y - y_t^s\|^2 \geq \phi(y_{t+1}^s) + \frac{1}{2\eta_s} \|y_{t+1}^s - y_t^s\|^2 + \frac{1}{2\eta_s} \|y - y_{t+1}^s\|^2. \quad (20)$$

**Proof of Theorem 4.** From the update rule of  $y_{t+1}^s$ , we know that

$$y_{t+1}^s = \arg \min_y h(y) + \langle u_t^s, y - y_t^s \rangle + \frac{1}{2\eta_s} \|y - y_t^s\|^2. \quad (21)$$

Applying Lemma 5 with  $\phi(y) = h(y) + \langle u_t^s, y - y_t^s \rangle$  and  $y = x^*$  in (20), we obtain

$$h(y_{t+1}^s) + \langle u_t^s, y_{t+1}^s - y_t^s \rangle \leq h(x^*) + \langle u_t^s, x^* - y_t^s \rangle + \frac{1}{2\eta_s} \|x^* - y_t^s\|^2 - \frac{1}{2\eta_s} \|x^* - y_{t+1}^s\|^2 - \frac{1}{2\eta_s} \|y_{t+1}^s - y_t^s\|^2. \quad (22)$$

Since  $f(x)$  is Lipschitz smooth, we have

$$\begin{aligned} \mathbf{E} f(x_{t+1}^s) & \leq \mathbf{E} \left( f(x_t^s) + \langle \nabla f(x_t^s), x_{t+1}^s - x_t^s \rangle + \frac{L}{2} \|x_{t+1}^s - x_t^s\|^2 \right) \\ & = \mathbf{E} \left( f(x_t^s) + \theta_s \langle u_t^s, y_{t+1}^s - y_t^s \rangle + \theta_s \langle \nabla f(x_t^s) - u_t^s, y_{t+1}^s - y_t^s \rangle + \frac{L}{2} \|x_{t+1}^s - x_t^s\|^2 \right), \end{aligned} \quad (23)$$

where the first equality uses  $x_{t+1}^s - x_t^s = \theta_s(y_{t+1}^s - y_t^s)$ . Therefore,

$$\begin{aligned}
\mathbf{E}P(x_{t+1}^s) &= \mathbf{E}\left[f(x_{t+1}^s) + h(x_{t+1}^s)\right] \\
&\leq \mathbf{E}\left[f(x_t^s) + \theta_s\langle u_t^s, y_{t+1}^s - y_t^s \rangle + \theta_s\langle \nabla f(x_t^s) - u_t^s, y_{t+1}^s - y_t^s \rangle + \frac{L}{2}\|x_{t+1}^s - x_t^s\|^2 + h(x_{t+1}^s)\right] \\
&\leq \mathbf{E}\left[f(x_t^s) + \theta_s\langle u_t^s, y_{t+1}^s - y_t^s \rangle + \theta_s\langle \nabla f(x_t^s) - u_t^s, y_{t+1}^s - y_t^s \rangle + \frac{L}{2}\|x_{t+1}^s - x_t^s\|^2 + (1 - \theta_s)h(\tilde{x}^{s-1}) + \theta_sh(y_{t+1}^s)\right] \\
&\leq \mathbf{E}\left[\theta_sh(x^*) + \underbrace{\theta_s\langle u_t^s, x^* - y_t^s \rangle}_{T_3} + \frac{\theta_s}{2\eta_s}\|x^* - y_t^s\|^2 - \frac{\theta_s}{2\eta_s}\|x^* - y_{t+1}^s\|^2 - \frac{\theta_s}{2\eta_s}\|y_{t+1}^s - y_t^s\|^2 \right. \\
&\quad \left. + f(x_t^s) + \underbrace{\theta_s\langle \nabla f(x_t^s) - u_t^s, y_{t+1}^s - y_t^s \rangle}_{T_4} + \frac{L}{2}\|x_{t+1}^s - x_t^s\|^2 + (1 - \theta_s)h(\tilde{x}^{s-1})\right], \tag{24}
\end{aligned}$$

where the first inequality uses (23), and the second inequality follows from  $x_{t+1}^s = \theta_sy_{t+1}^s + (1 - \theta_s)\tilde{x}^{s-1}$  and the convexity of  $h(x)$ . We apply (22) in the third inequality.  $T_3$  can be bounded as follows.

$$\begin{aligned}
\mathbf{E}T_3 &= \theta_s\mathbf{E}\langle u_t^s, x^* - y_t^s \rangle \\
&= \mathbf{E}\langle u_t^s, \theta_s x^* + (1 - \theta_s)\tilde{x}^{s-1} - x_t^s \rangle \\
&= \mathbf{E}\langle u_t^s, \theta_s x^* + (1 - \theta_s)\tilde{x}^{s-1} - Q_{(\delta_x, b_x)}(x_{D(t)}^s) \rangle + \mathbf{E}\langle u_t^s, Q_{(\delta_x, b_x)}(x_{D(t)}^s) - x_t^s \rangle \\
&= \mathbf{E}\langle \nabla f_a(Q_{(\delta_x, b_x)}(x_{D(t)}^s)), \theta_s x^* + (1 - \theta_s)\tilde{x}^{s-1} - Q_{(\delta_x, b_x)}(x_{D(t)}^s) \rangle + \mathbf{E}\langle \nabla f_a(Q_{(\delta_x, b_x)}(x_{D(t)}^s), Q_{(\delta_x, b_x)}(x_{D(t)}^s) - x_t^s \rangle \\
&\leq \mathbf{E}\left[f_a(\theta_s x^* + (1 - \theta_s)\tilde{x}^{s-1}) - f_a(Q_{(\delta_x, b_x)}(x_{D(t)}^s)) + f_a(Q_{(\delta_x, b_x)}(x_{D(t)}^s)) - f_a(x_t^s) + \frac{L}{2}\|Q_{(\delta_x, b_x)}(x_{D(t)}^s) - x_t^s\|^2\right] \\
&\leq \mathbf{E}\left[\theta_sf(x^*) + (1 - \theta_s)f(\tilde{x}^{s-1}) - f(x_t^s) + \frac{L}{2}\|Q_{(\delta_x, b_x)}(x_{D(t)}^s) - x_t^s\|^2\right], \tag{25}
\end{aligned}$$

where the convexity and Lipschitz smoothness of  $f_a(x)$  are adopted in the first inequality. Next we derive the bound of  $\mathbf{E}\|Q_{(\delta_x, b_x)}(x_{D(t)}^s) - x_t^s\|^2$  as follows.

$$\begin{aligned}
\mathbf{E}\|Q_{(\delta_x, b_x)}(x_{D(t)}^s) - x_t^s\|^2 &= \mathbf{E}\|Q_{(\delta_x, b_x)}(x_{D(t)}^s) - x_{D(t)}^s\|^2 + \mathbf{E}\|x_{D(t)}^s - x_t^s\|^2 \\
&\leq \theta_s\mu\mathbf{E}\|x_{D(t)}^s - \tilde{x}^{s-1}\|^2 + \mathbf{E}\|x_{D(t)}^s - x_t^s\|^2 \\
&\leq (1 + 2\theta_s\mu)\mathbf{E}\|x_{D(t)}^s - x_t^s\|^2 + 2\theta_s^3\mu\mathbf{E}\|y_t^s - \tilde{x}^{s-1}\|^2 \\
&\leq (1 + 2\theta_s\mu)\mathbf{E}\|x_{D(t)}^s - x_t^s\|^2 + 2\theta_s^3\mu D. \tag{26}
\end{aligned}$$

where the first equality holds because  $Q_{(\delta_x, b_x)}(x_{D(t)}^s)$  is an unbiased quantization and the first inequality comes from Step 7 in Algorithm 3. The second inequality holds because  $x_t^s - \tilde{x}^{s-1} = \theta_s(y_t^s - \tilde{x}^{s-1})$ . Therefore,

$$\mathbf{E}T_3 \leq \mathbf{E}\left[\theta_sf(x^*) + (1 - \theta_s)f(\tilde{x}^{s-1}) - f(x_t^s) + \frac{(1 + 2\theta_s\mu)L}{2}\|x_{D(t)}^s - x_t^s\|^2 + \theta_s^3\mu LD\right]. \tag{27}$$

Now we bound  $T_4$ . Define  $v_t^s \triangleq \nabla f_a(x_t^s) - \nabla f_a(\tilde{x}^{s-1}) + \nabla f(\tilde{x}^{s-1})$ .

$$\mathbf{E}T_4 = \theta_s\mathbf{E}\langle \nabla f(x_t^s) - u_t^s, y_{t+1}^s - y_t^s \rangle = \underbrace{\theta_s\mathbf{E}\langle \nabla f(x_t^s) - v_t^s, y_{t+1}^s - y_t^s \rangle}_{T_5} + \underbrace{\theta_s\mathbf{E}\langle v_t^s - u_t^s, y_{t+1}^s - y_t^s \rangle}_{T_6}. \tag{28}$$

$$\begin{aligned}
T_5 &= \theta_s \mathbf{E} \langle \nabla f(x_t^s) - v_t^s, y_{t+1}^s - y_t^s \rangle \\
&\leq \frac{\theta_s}{2\tau L} \mathbf{E} \|\nabla f(x_t^s) - v_t^s\|^2 + \frac{\tau L \theta_s}{2} \mathbf{E} \|y_{t+1}^s - y_t^s\|^2 \\
&\leq \frac{\theta_s}{2\tau L} \mathbf{E} \|\nabla f_a(x_t^s) - \nabla f_a(\tilde{x}^{s-1})\|^2 + \frac{\tau L \theta_s}{2} \mathbf{E} \|y_{t+1}^s - y_t^s\|^2 \\
&\leq \frac{\theta_s L^2}{2\tau L} \mathbf{E} \|x_t^s - \tilde{x}^{s-1}\|^2 + \frac{\tau L \theta_s}{2} \mathbf{E} \|y_{t+1}^s - y_t^s\|^2 \\
&= \frac{\theta_s^3 L^2}{2\tau L} \mathbf{E} \|y_t^s - \tilde{x}^{s-1}\|^2 + \frac{\tau L \theta_s}{2} \mathbf{E} \|y_{t+1}^s - y_t^s\|^2 \\
&\leq \frac{\theta_s^3 L D}{2\tau} + \frac{\tau L \theta_s}{2} \mathbf{E} \|y_{t+1}^s - y_t^s\|^2,
\end{aligned} \tag{29}$$

where in the first inequality we use Young's inequality. The second equality follows from  $x_t^s - \tilde{x}^{s-1} = \theta_s(y_t^s - \tilde{x}^{s-1})$ . Moreover,

$$\begin{aligned}
T_6 &= \theta_s \mathbf{E} \langle v_t^s - u_t^s, y_{t+1}^s - y_t^s \rangle \\
&\leq \frac{\theta_s}{2\tau L} \mathbf{E} \|v_t^s - u_t^s\|^2 + \frac{\tau L \theta_s}{2} \mathbf{E} \|y_{t+1}^s - y_t^s\|^2.
\end{aligned} \tag{30}$$

From the definition of  $u_t^s$  and  $v_t^s$ , we have

$$\begin{aligned}
&\mathbf{E} \|v_t^s - u_t^s\|^2 \\
&= \mathbf{E} \|Q_{(\delta_{\alpha_t}, b)}(\alpha_t) - \nabla f_a(x_t^s) + \nabla f_a(\tilde{x}^{s-1})\|^2 \\
&= \mathbf{E} \|Q_{(\delta_{\alpha_t}, b)}(\nabla f_a(Q_{(\delta_x, b_x)}(x_{D(t)}^s)) - \nabla f_a(\tilde{x}^{s-1})) - \nabla f_a(Q_{(\delta_x, b_x)}(x_{D(t)}^s)) + \nabla f_a(\tilde{x}^{s-1})\|^2 \\
&\quad + \mathbf{E} \|\nabla f_a(Q_{(\delta_x, b_x)}(x_{D(t)}^s)) - \nabla f_a(x_t^s)\|^2 \\
&\leq \frac{d}{4(2^{b-1} - 1)^2} \mathbf{E} \|\nabla f_a(Q_{(\delta_x, b_x)}(x_{D(t)}^s)) - \nabla f_a(\tilde{x}^{s-1})\|^2 + \mathbf{E} \|\nabla f_a(Q_{(\delta_x, b_x)}(x_{D(t)}^s)) - \nabla f_a(x_t^s)\|^2 \\
&\leq \frac{dL^2}{4(2^{b-1} - 1)^2} \mathbf{E} \|Q_{(\delta_x, b_x)}(x_{D(t)}^s) - \tilde{x}^{s-1}\|^2 + L^2 \mathbf{E} \|Q_{(\delta_x, b_x)}(x_{D(t)}^s) - x_t^s\|^2 \\
&\leq \left[ \frac{dL^2}{2(2^{b-1} - 1)^2} + L^2 \right] \mathbf{E} \|Q_{(\delta_x, b_x)}(x_{D(t)}^s) - x_t^s\|^2 + \frac{dL^2}{2(2^{b-1} - 1)^2} \mathbf{E} \|x_t^s - \tilde{x}^{s-1}\|^2 \\
&\leq \left[ \frac{dL^2}{(2^{b-1} - 1)^2} + 2L^2 \right] \mathbf{E} \|Q_{(\delta_x, b_x)}(x_{D(t)}^s) - x_{D(t)}^s\|^2 + \left[ \frac{dL^2}{(2^{b-1} - 1)^2} + 2L^2 \right] \mathbf{E} \|x_{D(t)}^s - x_t^s\|^2 \\
&\quad + \frac{dL^2 \theta_s^2}{2(2^{b-1} - 1)^2} \mathbf{E} \|y_t^s - \tilde{x}^{s-1}\|^2 \\
&\leq \left[ \frac{dL^2}{(2^{b-1} - 1)^2} + 2L^2 \right] \theta_s \mu \mathbf{E} \|x_{D(t)}^s - \tilde{x}^{s-1}\|^2 + \left[ \frac{dL^2}{(2^{b-1} - 1)^2} + 2L^2 \right] \mathbf{E} \|x_{D(t)}^s - x_t^s\|^2 + \frac{dL^2 \theta_s^2 D}{2(2^{b-1} - 1)^2} \\
&\leq \left[ \frac{dL^2}{(2^{b-1} - 1)^2} + 2L^2 \right] (1 + 2\theta_s \mu) \mathbf{E} \|x_{D(t)}^s - x_t^s\|^2 + \left[ \frac{2dL^2}{(2^{b-1} - 1)^2} + 4L^2 \right] \theta_s \mu \mathbf{E} \|x_t^s - \tilde{x}^{s-1}\|^2 + \frac{dL^2 \theta_s^2 D}{2(2^{b-1} - 1)^2} \\
&\leq (1 + 2\theta_s \mu) L^2 \left[ \frac{d}{(2^{b-1} - 1)^2} + 2 \right] \mathbf{E} \|x_{D(t)}^s - x_t^s\|^2 + \theta_s^3 L^2 \mu \left[ \frac{2d}{(2^{b-1} - 1)^2} + 4 \right] D + \frac{dL^2 \theta_s^2 D}{2(2^{b-1} - 1)^2},
\end{aligned} \tag{31}$$

where the second equality holds because  $Q_{(\delta_{\alpha_t}, b)}(\alpha_t)$  is an unbiased quantization, and the first inequality uses Lemma 1. In the fourth and final inequality, we adopt  $x_t^s - \tilde{x}^{s-1} = \theta_s(y_t^s - \tilde{x}^{s-1})$ . The fifth inequality follows from Step 7 of Algorithm 3. Putting them together, we obtain

$$\begin{aligned}
\mathbf{E} T_4 &\leq \tau L \theta_s \mathbf{E} \|y_{t+1}^s - y_t^s\|^2 + \frac{L \theta_s (1 + 2\theta_s \mu)}{2\tau} \left[ \frac{d}{(2^{b-1} - 1)^2} + 2 \right] \mathbf{E} \|x_{D(t)}^s - x_t^s\|^2 + \frac{LD \theta_s^3}{2\tau} \left[ \frac{d}{2(2^{b-1} - 1)^2} + 1 \right] \\
&\quad + \frac{\theta_s^4 LD \mu}{2\tau} \left[ \frac{2d}{(2^{b-1} - 1)^2} + 4 \right].
\end{aligned} \tag{32}$$

Substituting (32) and (27) in (24), we get

$$\begin{aligned}
\mathbf{E}P(x_{t+1}^s) \leq & \mathbf{E} \left[ (1 - \theta_s)P(\tilde{x}^{s-1}) + \theta_s P(x^*) + \frac{\theta_s}{2\eta_s} (\|x^* - y_t^s\|^2 - \|x^* - y_{t+1}^s\|^2) \right. \\
& + \theta_s^3 \mu LD + \frac{LD\theta_s^3}{2\tau} \left[ \frac{d}{2(2^{b-1}-1)^2} + 1 \right] + \frac{\theta_s^4 LD\mu}{2\tau} \left[ \frac{2d}{(2^{b-1}-1)^2} + 4 \right] \\
& + \underbrace{\frac{(1+2\theta_s\mu)L}{2} \|x_{D(t)}^s - x_t^s\|^2 + \tau L\theta_s \|y_{t+1}^s - y_t^s\|^2 + \frac{L\theta_s(1+2\theta_s\mu)}{2\tau} \left[ \frac{d}{(2^{b-1}-1)^2} + 2 \right] \|x_{D(t)}^s - x_t^s\|^2}_{T_7} \\
& \left. + \underbrace{\frac{L}{2} \|x_{t+1}^s - x_t^s\|^2 - \frac{\theta_s}{2\eta_s} \|y_{t+1}^s - y_t^s\|^2}_{T_8} \right].
\end{aligned} \tag{33}$$

Let  $\eta_s\theta_s = \frac{1}{\sigma L}$  where  $\sigma > 1$ , since  $\sum_{t=0}^{m-1} \sum_{d=D(t)}^{t-1} \|x_{d+1}^s - x_d^s\|^2 \leq \tau \sum_{t=0}^{m-1} \|x_{t+1}^s - x_t^s\|^2$ , it can be verified that

$$\sum_{t=0}^{m-1} (T_7 + T_8) \leq \xi \sum_{t=0}^{m-1} \|y_{t+1}^s - y_t^s\|^2, \tag{34}$$

where  $\xi = \tau^2\theta_s^2 \left[ \frac{(1+2\theta_s\mu)L}{2} + \frac{(1+2\theta_s\mu)\theta_s L}{2\tau} \left( \frac{d}{(2^{b-1}-1)^2} + 2 \right) \right] + \tau L\theta_s + \frac{L\theta_s^2}{2} - \frac{\sigma L\theta_s^2}{2}$ . Denote  $\Delta = \frac{d}{(2^{b-1}-1)^2} + 2$ , if  $\tau \leq \frac{\sqrt{\left( \frac{2}{(1+2\theta_s\mu)\theta_s} + \theta_s\Delta \right)^2 + \frac{4(\sigma-1)}{(1+2\theta_s\mu)} - \left( \frac{2}{(1+2\theta_s\mu)\theta_s} + \theta_s\Delta \right)}}{2}$ , then  $\xi \leq 0$ . Suppose the above constraint holds, we have

$$\sum_{t=0}^{m-1} \mathbf{E}P(x_{t+1}^s) \leq \sum_{t=0}^{m-1} \mathbf{E} \left[ (1 - \theta_s)P(\tilde{x}^{s-1}) + \theta_s P(x^*) + \frac{\theta_s}{2\eta_s} (\|x^* - y_t^s\|^2 - \|x^* - y_{t+1}^s\|^2) + \theta_s^3 \mu LD + \frac{\theta_s^3 LD\Delta}{4\tau} + \frac{\theta_s^4 LD\Delta\mu}{\tau} \right]. \tag{35}$$

Using  $\tilde{x}^s = \frac{1}{m} \sum_{t=0}^{m-1} x_{t+1}^s$ , we obtain

$$\mathbf{E} \left[ P(\tilde{x}^s) - P(x^*) \right] \leq \mathbf{E} \left[ (1 - \theta_s) (P(\tilde{x}^{s-1}) - P(x^*)) + \frac{\sigma L\theta_s^2}{2m} (\|y_0^s - x^*\|^2 - \|y_m^s - x^*\|^2) + \theta_s^3 \mu LD + \frac{\theta_s^3 LD\Delta}{4\tau} + \frac{\theta_s^4 LD\Delta\mu}{\tau} \right]. \tag{36}$$

Dividing both sides of (36) by  $\theta_s^2$ , summing over  $s = 1$  to  $S$ , and using the definition  $y_0^s = y_m^{s-1}$  and that  $\frac{1-\theta_s}{\theta_s^2} \leq \frac{1}{\theta_{s-1}^2}$  when  $\theta_s = \frac{2}{s+2}$ , we have

$$\mathbf{E} \left[ P(\tilde{x}^S) - P(x^*) \right] \leq \frac{4 \left[ P(\tilde{x}^0) - P(x^*) \right]}{(S+2)^2} + \frac{2\sigma L \|\tilde{x}^0 - x^*\|^2}{m(S+2)^2} + \frac{8(\Delta(1+\mu)/\tau + \mu)LD \log(S+2)}{(S+2)^2}. \tag{37}$$

□

## References

- [1] G. Lan. An optimal method for stochastic composite optimization. *Mathematical Programming*, 133(1-2):365–397, 2012.
- [2] S. J. Reddi, S. Sra, B. Póczos, and A. Smola. Fast stochastic methods for nonsmooth nonconvex optimization. In *Advances in Neural Information Processing Systems*, 2016.
- [3] H. Wang, S. Sievert, S. Liu, Z. Charles, D. Papailiopoulos, and S. Wright. Atomo: Communication-efficient learning via atomic sparsification. In *Advances in Neural Information Processing Systems*, 2018.
- [4] Y. Yu, J. Wu, and J. Huang. Exploring fast and communication-efficient algorithms in large-scale distributed networks. *AISTATS*, 2019.
